# Supplementary material for: A secretory pathway kinase regulates sarcoplasmic reticulum Ca2+ homeostasis and protects against heart failure
Source: eLife journal article supplement (doi:10.7554/elife.41378), 2018-12-06
Supplement: supp [file elife-41378-supp-v1.zip]

Archive with 5 entries (5 files):
- elife_poa_e41378_Figure_7_figure_supplement_1.pdf
- elife_poa_e41378_Figure_3_figure_supplement_1.pdf
- elife_poa_e41378_Figure_6_figure_supplement_1.pdf
- elife_poa_e41378_Transparent_Reporting_File.pdf
- elife_poa_e41378_Figure_4_figure_supplement_1.pdf
