# Supplementary material for: A secretory pathway kinase regulates sarcoplasmic reticulum Ca2+ homeostasis and protects against heart failure
Source: eLife journal article supplement (doi:10.7554/elife.41378), 2018-12-06
Supplement: supp [file elife-41378-supp-v1.zip › elife_poa_e41378_Figure_3_figure_supplement_1.pdf]

**A**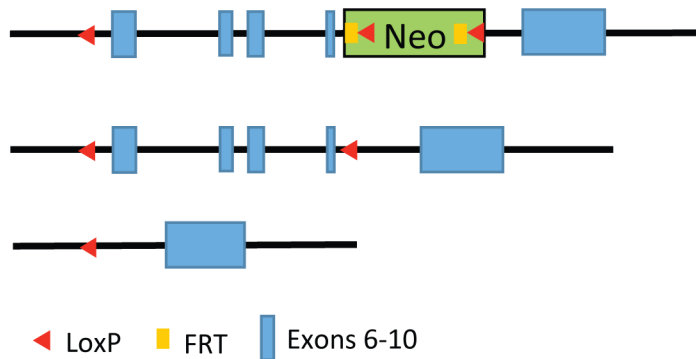**B DNA Genotyping**Flox: FL<sup>-/-</sup> FL<sup>+/-</sup> FL<sup>+/+</sup>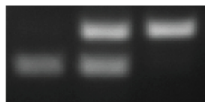

Cre: - +

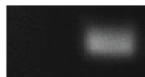**C****Fam20C**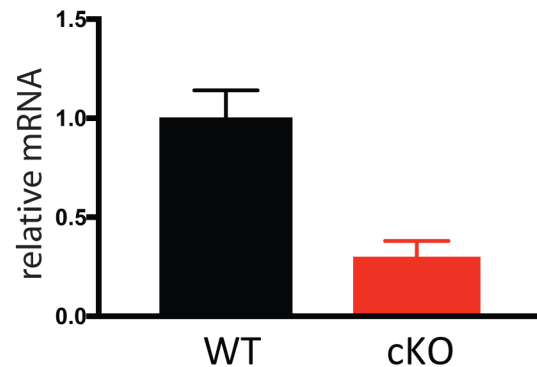**D****Cardiac fractionation**Lysate  
ER/Golgi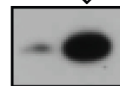

IB: BIP

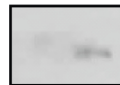

IB: CSQ2

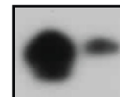

IB: GAPDH

**ER/Golgi**

cKO WT

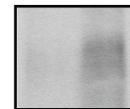

IB: Fam20C

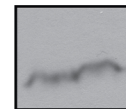

IB: CSQ2
