# Supplementary figures and images for: A secretory pathway kinase regulates sarcoplasmic reticulum Ca2+ homeostasis and protects against heart failure
Source: eLife journal article supplement (doi:10.7554/elife.41378), 2018-12-06

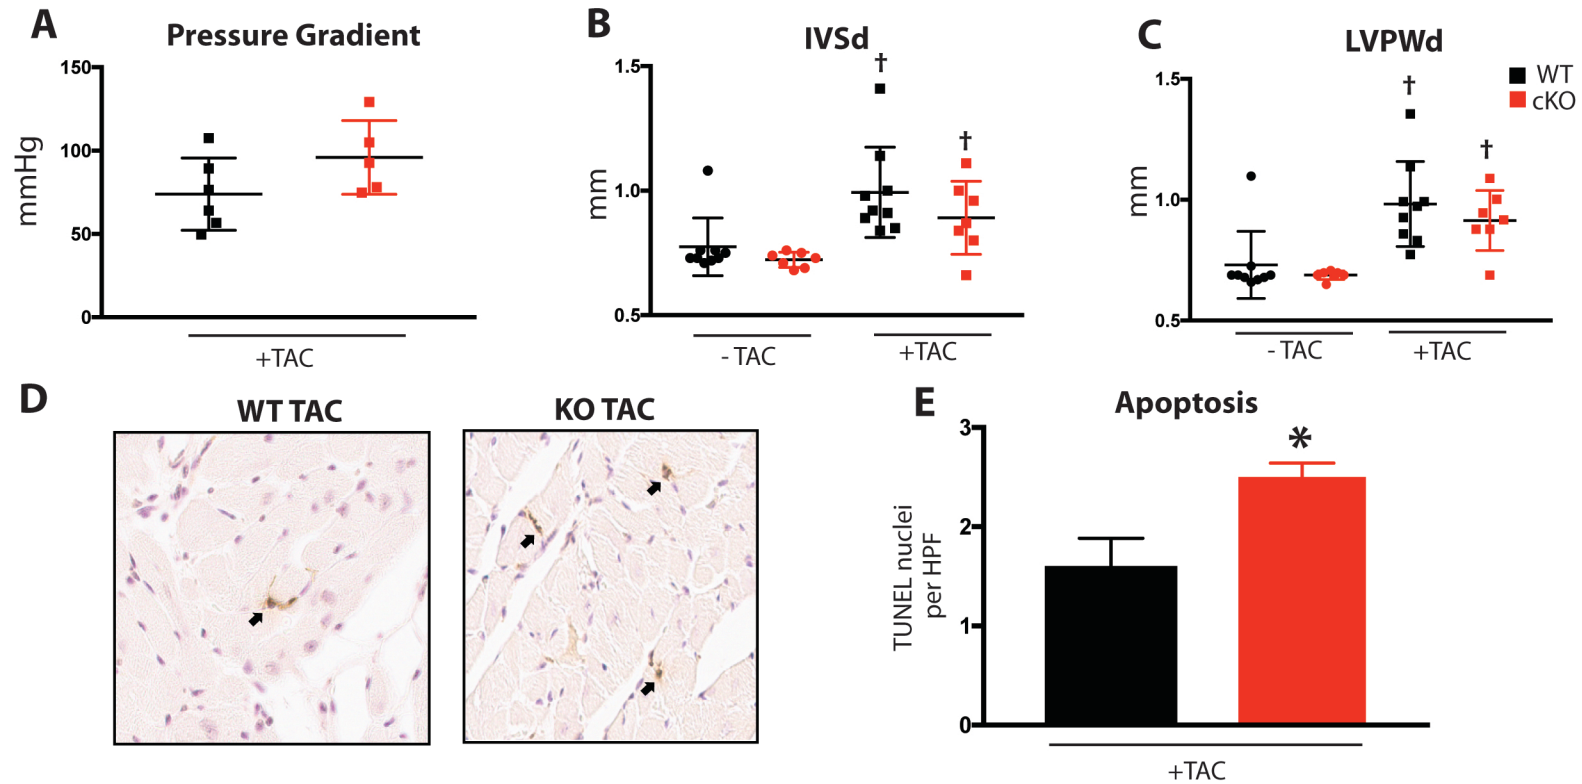

Supplement: supp [file elife-41378-supp-v1.zip › elife_poa_e41378_Figure_7_figure_supplement_1.pdf]

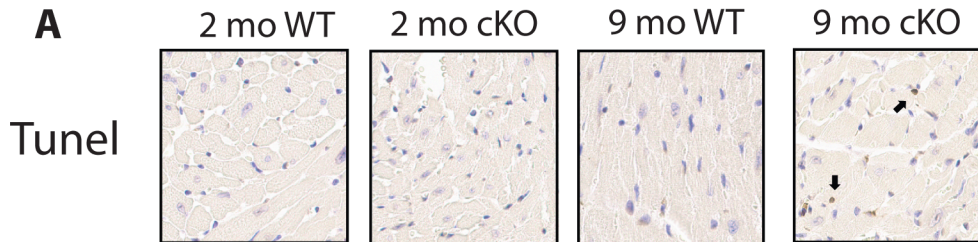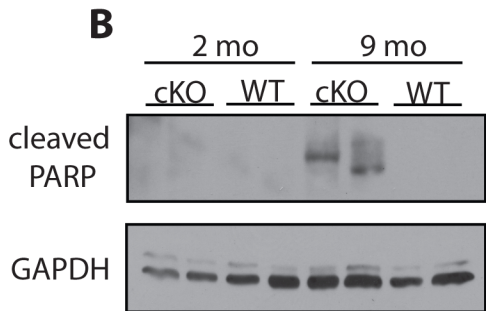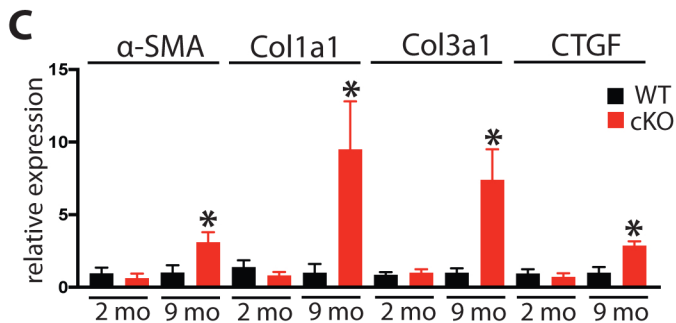

Supplement: supp [file elife-41378-supp-v1.zip › elife_poa_e41378_Figure_6_figure_supplement_1.pdf]

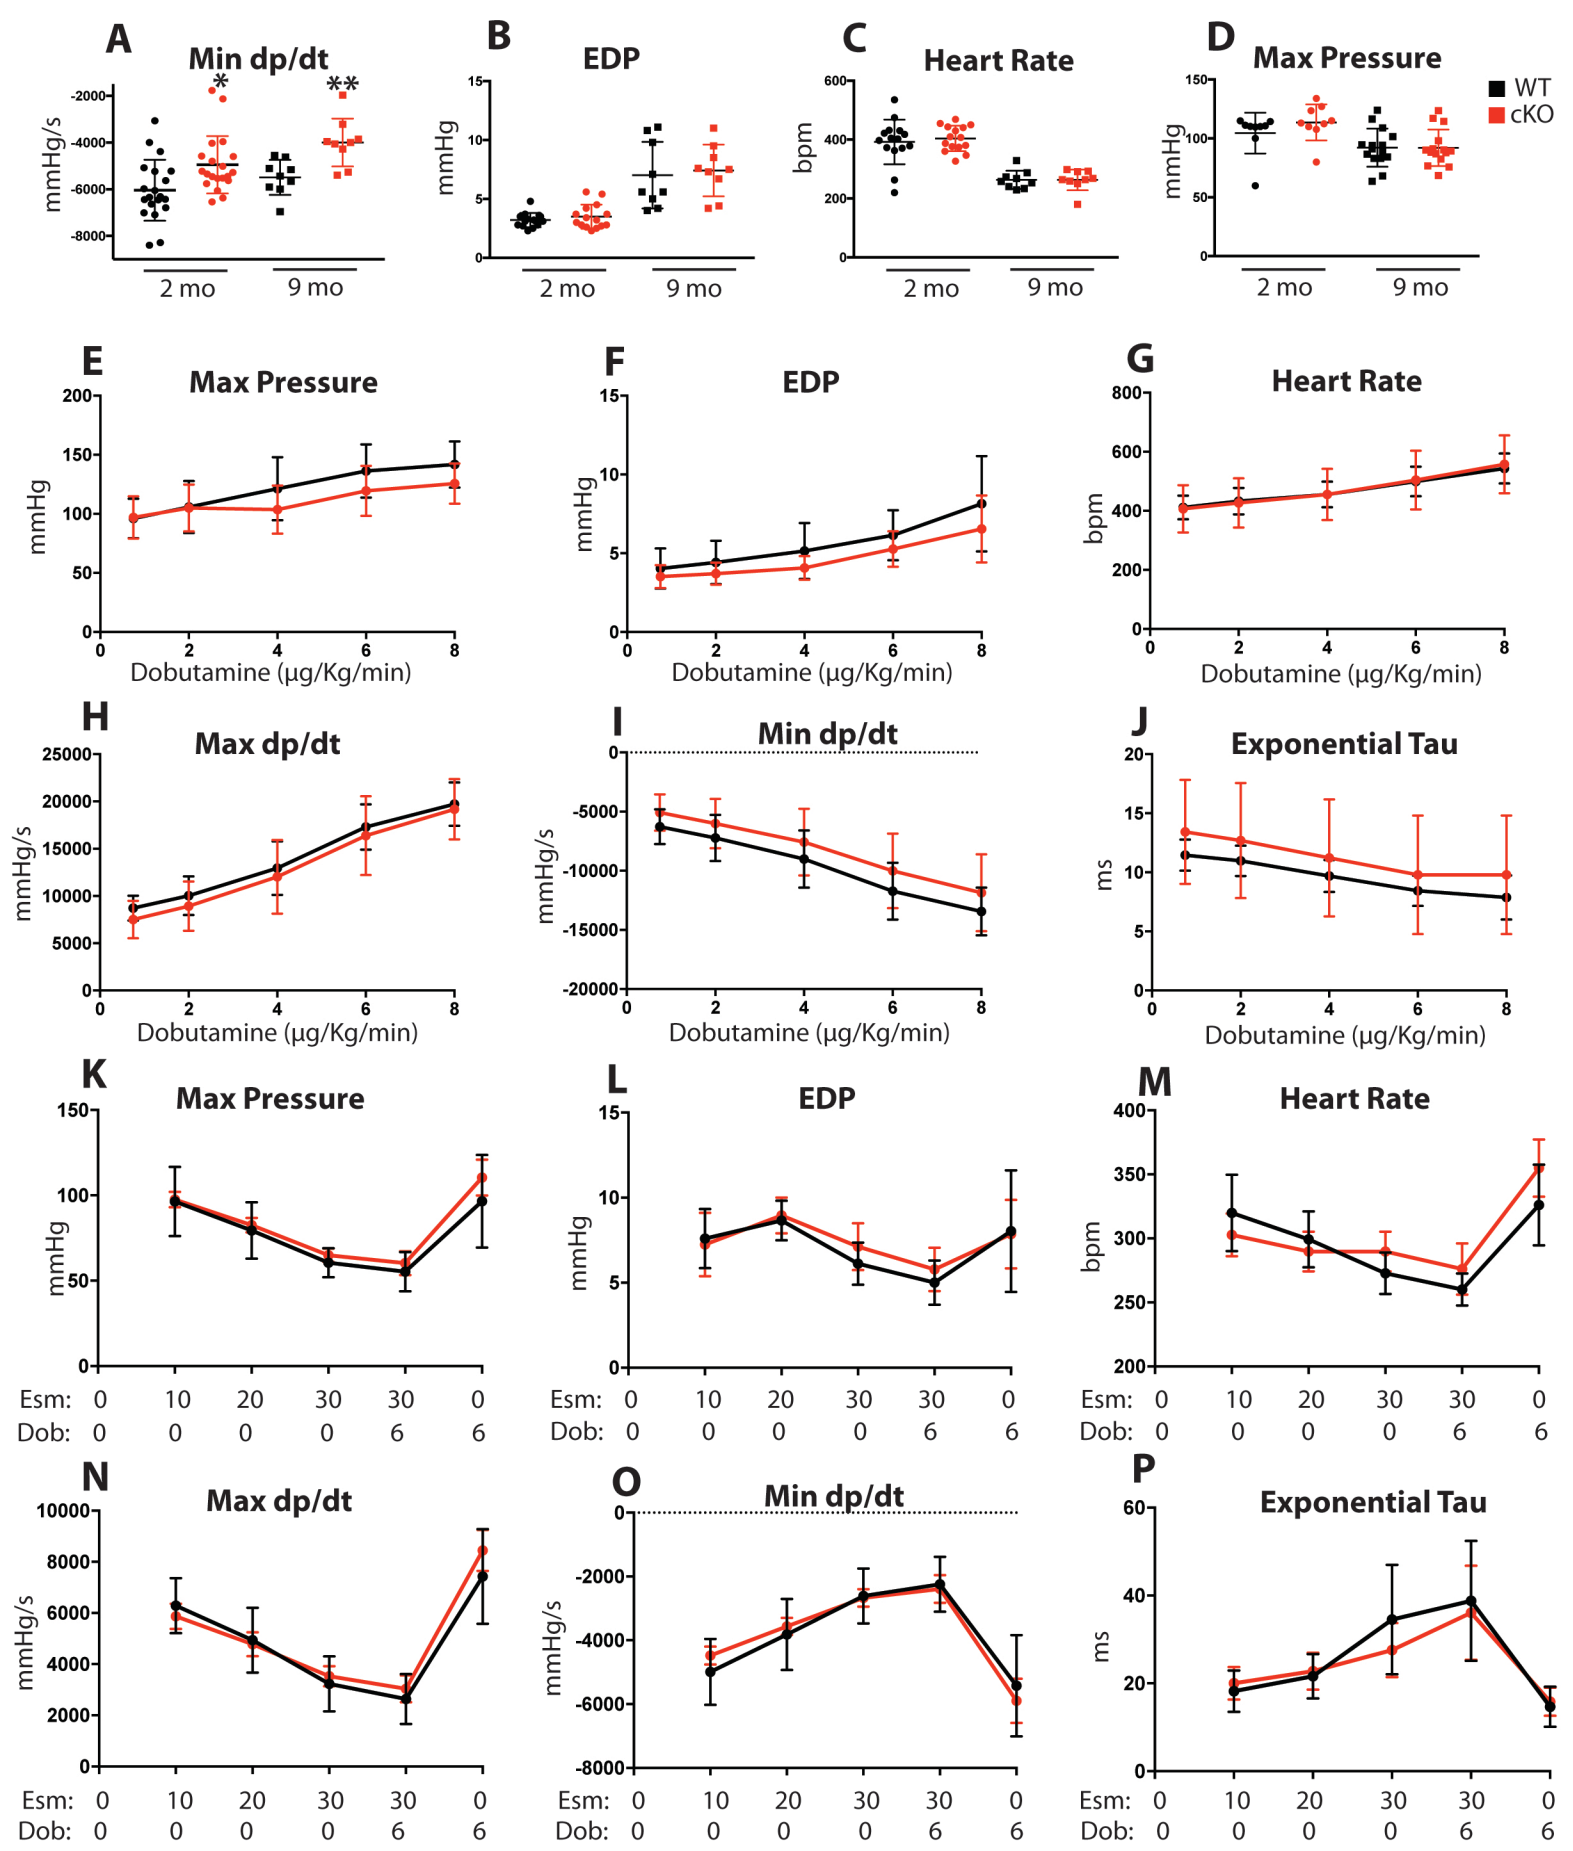

Supplement: supp [file elife-41378-supp-v1.zip › elife_poa_e41378_Figure_4_figure_supplement_1.pdf]
